# Supplementary material for: VibrioBase: A Model for Next-Generation Genome and Annotation Database Development
Source: Hindawi journal article supplement (doi:10.1155/2014/569324), 2014-01-01
Supplement: f1 [file 569324.f1.pdf]

## Supplementary Data

**Supplementary Table 1.** List of *Vibrio* species in VibrioBase.

| #  | Species                    | Number of Draft Genomes | Number of Complete Genomes |
|----|----------------------------|-------------------------|----------------------------|
| 1  | <i>V. alginolyticus</i>    | 3                       | 0                          |
| 2  | <i>V. anguillarum</i>      | 2                       | 1                          |
| 3  | <i>V. brasiliensis</i>     | 1                       | 0                          |
| 4  | <i>V. breoganii</i>        | 3                       | 0                          |
| 5  | <i>V. campbellii</i>       | 3                       | 0                          |
| 6  | <i>V. caribbenthicus</i>   | 1                       | 0                          |
| 7  | <i>V. cholerae</i>         | 124                     | 10                         |
| 8  | <i>V. coralliilyticus</i>  | 2                       | 0                          |
| 9  | <i>V. crassostreae</i>     | 5                       | 0                          |
| 10 | <i>V. cyclitrophicus</i>   | 20                      | 0                          |
| 11 | <i>V. fischeri</i>         | 0                       | 3                          |
| 12 | <i>V. furnissii</i>        | 1                       | 1                          |
| 13 | <i>V. harveyi</i>          | 4                       | 1                          |
| 14 | <i>V. ichthyoenteri</i>    | 1                       | 0                          |
| 15 | <i>V. kanaloae</i>         | 1                       | 0                          |
| 16 | <i>V. metschnikovii</i>    | 1                       | 0                          |
| 17 | <i>V. mimicus</i>          | 6                       | 0                          |
| 18 | <i>V. nigripulchritudo</i> | 1                       | 0                          |
| 19 | <i>V. ordalii</i>          | 6                       | 0                          |
| 20 | <i>V. orientalis</i>       | 2                       | 0                          |
| 21 | <i>V. parahaemolyticus</i> | 7                       | 2                          |
| 22 | <i>V. rotiferianus</i>     | 1                       | 0                          |
| 23 | <i>V. rumoiensis</i>       | 1                       | 0                          |
| 24 | <i>V. scophthalmi</i>      | 1                       | 0                          |
| 25 | <i>V. shilonii</i>         | 1                       | 0                          |
| 26 | <i>V. sinaloensis</i>      | 1                       | 0                          |
| 27 | <i>V. sp</i>               | 12                      | 1                          |
| 28 | <i>V. splendidus</i>       | 5                       | 2                          |
| 29 | <i>V. tasmaniensis</i>     | 5                       | 0                          |
| 30 | <i>V. tubiashii</i>        | 2                       | 0                          |
| 31 | <i>V. vulnificus</i>       | 5                       | 3                          |
